# Supplementary material
Source: publisher site journal article supplement (https://www.spandidos-publications.com/2152/downloadSupplementary)
Supplement: Supplementary file 1 [file downloadSupplementary]

Figure S1. Composition of CRC-PDOs. Fluorescence microscopy images for goblet cells (Muc2<sup>+</sup>, red), entero-endocrine cells (ChgA<sup>+</sup>, red), enterocytes (VL1<sup>+</sup>, red) and proliferating cells (Ki-67, red). Counterstain, DAPI (blue) and epithelial, E-cadherin (green). Scale bars, 100  $\mu$ m. CRC, colorectal cancer; PDO, patient-derived organoid; Muc2, mucin 2; ChgA, chromogranin A.

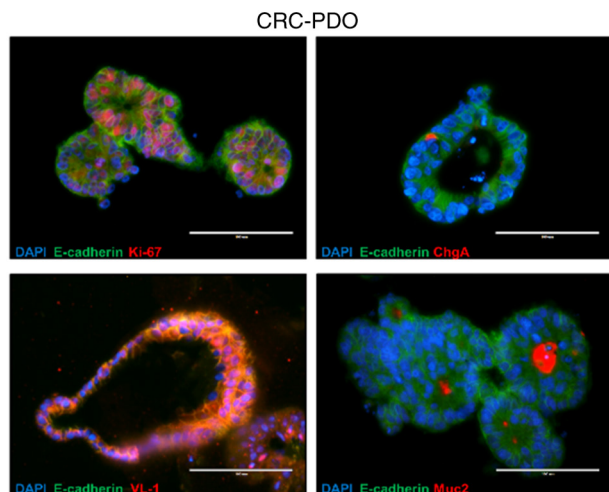

Figure S2. Immunohistochemical analysis of organoids and corresponding samples. H&E staining and CK19, CK20 and CDX2 immunostaining of CRC-PDO #3. Magnifications at 40x. Scale bar, 50  $\mu$ m. H&E, hematoxylin and eosin; CK, cytokeratin; CRC, colorectal cancer; PDO, patient-derived organoid.

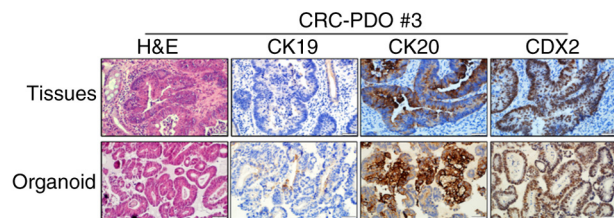

Figure S3. Dose-dependent effect of butyrate on CRC-PDOs. (A) Morphology of CRC-PDO #3 treated with butyrate of the indicated concentrations after 3 days. Scale bar, 200  $\mu$ m. (B) Relative CRC-PDO #3 size 3 days after treatment with butyrate of the indicated concentrations (n=3). (C) MTT cell viability assay of organoids described in B (n=3). Data are presented as mean  $\pm$  standard error of the mean. \*P<0.05, \*\*P<0.01. CRC, colorectal cancer; PDO, patient-derived organoid.

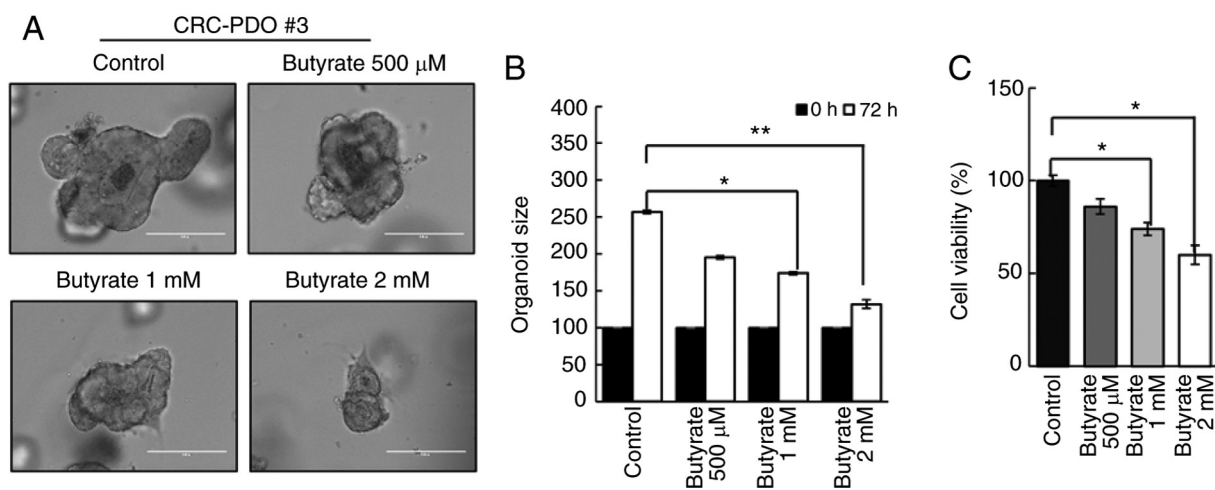

Figure S4. Expression of Ki-67 and  $\gamma$ -H2AX in CRC-PDOs treated with butyrate and radiation. (A) CRC-PDO #7 was treated with radiation and/or butyrate and analyzed by reverse transcription-quantitative PCR for Ki-67 after 72 h. The expression level of the target mRNA was normalized to that of GAPDH mRNA (n=3). Data are presented as mean  $\pm$  standard error of the mean. \*P<0.05, \*\*P<0.01. (B) Protein expression of  $\gamma$ -H2AX after RT, with or without butyrate, in the CRC-PDOs.  $\beta$ -actin served as a loading control. CRC, colorectal cancer; PDO, patient-derived organoid; RT, radiation treatment; IR, irradiation.

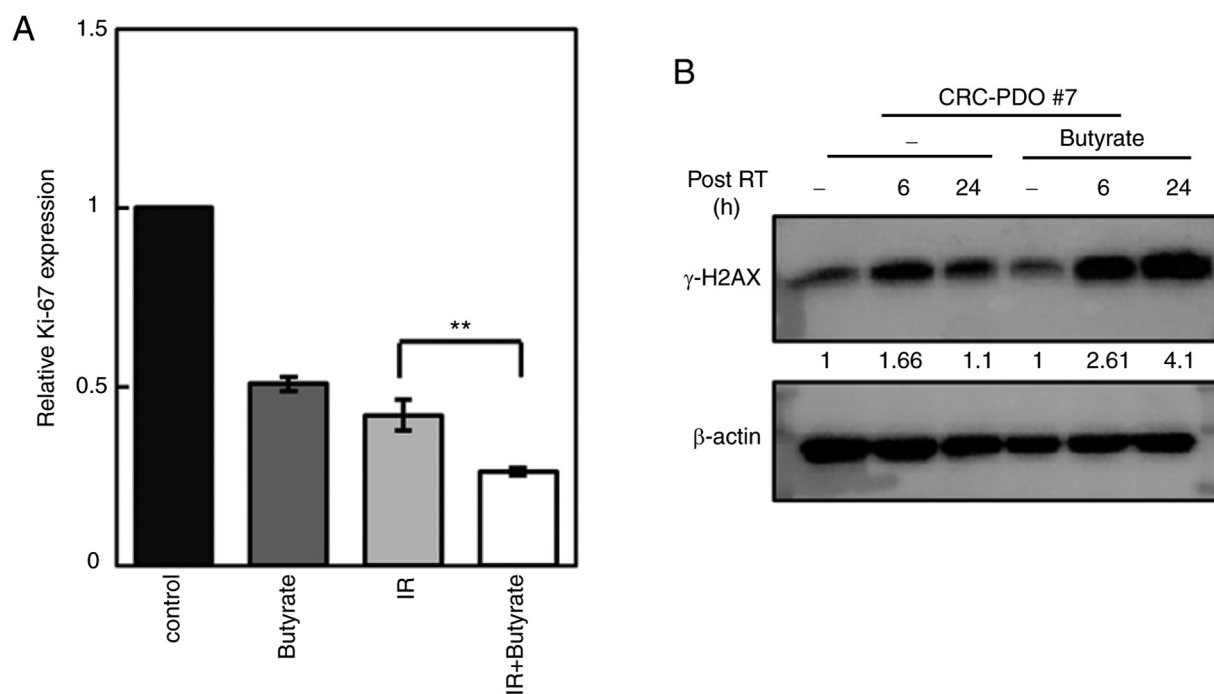

Table SI. Clinical characteristics of patients.

| Patient ID  | Age, years | Sex | (y)pTNM <sup>a</sup> | Stage | KRAS | NRAS | BRAF | MSI/MSS | Tumor location | Butyrate response |
|-------------|------------|-----|----------------------|-------|------|------|------|---------|----------------|-------------------|
| CRC-PDO #3  | 53         | F   | ypT3N1M0             | III   | Mt   | Wt   | Wt   | MSS     | Rectum         | Response          |
| CRC-PDO #5  | 85         | F   | ypT3N0M0             | II    | Wt   | Wt   | Wt   | MSS     | Rectum         | Response          |
| CRC-PDO #7  | 65         | F   | ypT3N2M0             | III   | Mt   | Wt   | Wt   | MSS     | Rectum         | Response          |
| CRC-PDO #8  | 48         | M   | ypT2N2M0             | III   | N/A  | N/A  | N/A  | N/A     | Rectum         | Response          |
| CRC-PDO #9  | 71         | M   | ypT2N0M0             | I     | Wt   | Wt   | Wt   | MSS     | Rectum         | No response       |
| CRC-PDO #11 | 53         | M   | ypT3N1M0             | III   | Wt   | Wt   | Wt   | MSS     | Rectum         | No response       |
| CRC-PDO #13 | 58         | M   | ypT2N1M0             | III   | Wt   | Wt   | Wt   | MSS     | Rectum         | Response          |
| CRC-PDO #33 | 59         | F   | pT3N0M0              | II    | Wt   | Wt   | Wt   | MSS     | Colon          | No response       |

<sup>a</sup>Indicates the TNM stage after preoperative therapy. All tumors were staged according to the 8th edition of the American Joint Committee on Cancer (23). F, female; M, male; Mt, mutation; Wt, wild type; MSI, microsatellite instability; MSS, microsatellite stable; CRC, colorectal cancer; PDO, patient-derived organoid; N/A, not available.

Table SII. Primer sequences.

| Gene   | Forward primer (5'-3') | Reverse primer (5'-3') |
|--------|------------------------|------------------------|
| p21    | TGTCCGTCAGAACCCATGC    | AAAGTCGAAGTTCCATCGCTC  |
| p57    | GCGGCGATCAAGAAGCTGT    | GCTTGGCGAAGAAATCGGAGA  |
| Gadd45 | TGCTGTGACAACGACATCAAC  | GTGAGGGTTCGTGACCAGG    |
| GAPDH  | TGCACCACCAACTGCTTAGC   | GGCATGGACTGTGGTCATGAG  |
